# Supplementary material for: Helical heterojunctions originating from helical inversion of conducting polymer nanofibers
Source: Royal Society of Chemistry journal article supplement (doi:10.1039/c2cc17235f), 2011-12-14
Supplement: c2cc17235f.pdf [file c2cc17235f.pdf]

## Supplementary Information

# Helical Heterojunctions Originated from Helical Inversion of Conducting Polymers Nanofibers

Yong Yan, Jin Fang, Jie Liang, Yajie Zhang and Zhixiang Wei \*

### Experimental

D- or L-CSA is dissolved in 1.5 mL de-ionized water, followed by adding aniline and *N*-methyl aniline with different  $[N\text{-An}]/[\text{An}]$  ratio and then the mixture is stirred for 1 h. The same molar of ammonium persulfate as that of total monomer (aniline + *N*-methyl aniline) is dissolved in 1 mL de-ionized water and added in five portions at intervals of 1.5 h. After each addition, the mixed solution is stirred vigorously for 5 minutes for fully dispersion. The reaction mixture is left standing at 25 °C for 12 h to finish the polymerization. The as-synthesized helical polymers are characterized by using Jasco J810 and Perkin-Elmer Lambda 950 for spectrum recording of CD and UV-*vis*, respectively, and the morphology is examined by SEM (Hitachi S-48000) and TEM (Tecnai G<sup>2</sup> 20 S-TWIN).

### Additional Figures:

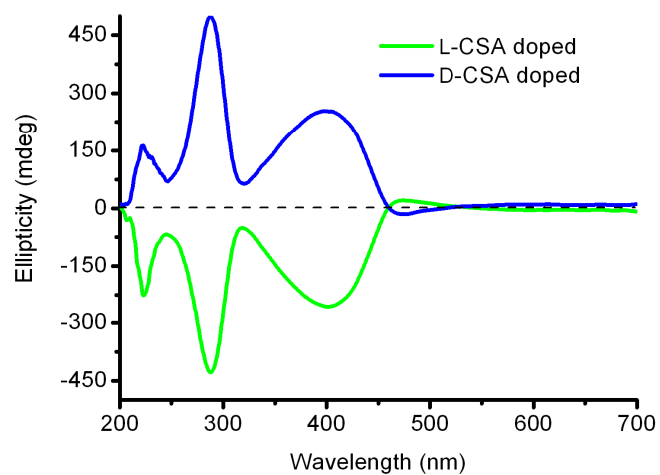

**Fig. S1** CD spectra of of helical PNANI nanofibers obtained using D- and L-CSA as the dopant at the  $[N-An]/[An] = 1:2.5$  respectively. All experiments were carried out at 25 °C with total monomer and chiral CSA concentrations of 0.14 M and 2.8 M respectively.

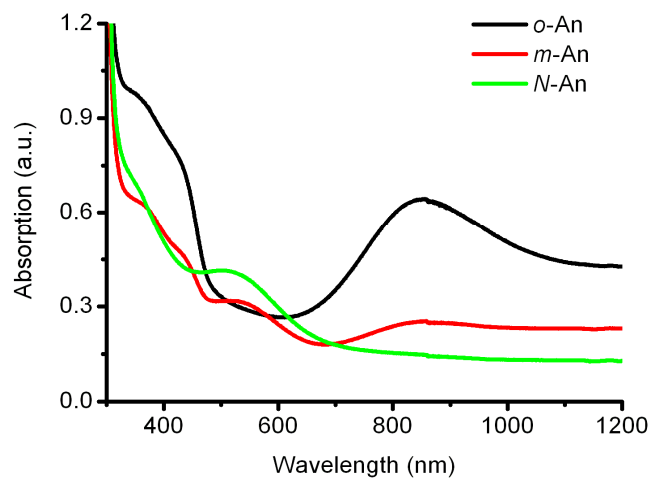

**Fig. S2** UV-*vis* spectra of copolyaniline with  $[s\text{-An}]/[\text{An}] = 1:1$ . It shows that the difficulties for copolymerization increased in the sequence of  $o\text{-An} < m\text{-An} < N\text{-An}$  due to there is no peak beyond 800 nm for  $N\text{-An}$  copolymer. All experiments were carried out at 25 °C with total monomer and D-CSA concentrations of 0.14 M and 2.8 M respectively.
